1 **CHRONIC INFLAMMATION IN ULCERATIVE COLITIS CAUSES LONG TERM**  
2 **CHANGES IN GOBLETCELL FUNCTION**

3  
4 Varsha Singh<sup>1#</sup>, Kelli Johnson<sup>1,2</sup>, Jianyi Yin<sup>3</sup>, Sunny Lee<sup>1</sup>, Ruxian Lin<sup>1</sup>, Helen Yu<sup>1</sup>, Julie G. In<sup>4</sup>, Jennifer  
5 Foulke-Abel<sup>1</sup> and Nicholas Zachos<sup>1</sup>

6  
7 <sup>1</sup>Division of Gastroenterology & Hepatology, <sup>2</sup>Department of Cellular and Molecular  
8 Physiology, Departments of Medicine, School of Medicine, Johns Hopkins University,  
9 Baltimore, MD 21205, USA

10 <sup>3</sup>The University of Texas Southwestern Medical Center: Dallas, Texas 75390, US

11 <sup>4</sup>Division of Gastroenterology and Hepatology, Department of Internal Medicine, University of  
12 New Mexico Health Science Center, Albuquerque, NM 87131, USA

13

14 **#Correspondence**

15 Varsha Singh, PhD

16 Departments of Physiology and Medicine, Gastroenterology Division,  
17 Johns Hopkins University School of Medicine,  
18 Ross 933, 720 Rutland Avenue, Baltimore, MD 21205,

19 410-955-9675

20 E-mail: vsingh11@jhmi.edu

21

22

23

24

25

26

27

28

29

30

31

32 **ABSTRACT**

33 **Objective** One of the features of ulcerative colitis (UC) is a defect in the protective mucus layer.  
34 This has been attributed to a reduced number of goblet cells (GC). However, it is not known  
35 whether abnormal GC mucus secretion also contributes to the reduced mucus layer. Our aims  
36 were to test the hypothesis that GC secretion was abnormal in UC with the changes persistent in  
37 colonoids even in the absence of immune cells.

38 **Design** Colonoids were established from intestinal stem cells of healthy subjects (HS) and from  
39 patients with UC (inactive and active sites). Colonoids were maintained as undifferentiated (UD)  
40 or induced to differentiate (DF) and studied as 3D or monolayers on Transwell filters. Total  
41 RNA was extracted for quantitative real-time PCR analysis. Carbachol and PGE<sub>2</sub> mediated  
42 stimulation followed by examination of mucus layer by MUC2 IF/confocal microscopy and  
43 TEM were performed.

44 **Results** Colonoids derived from patients with UC can be propagated over many passages;  
45 however, they exhibit a reduced rate of growth and TEER compared with colonoids from HS.  
46 Differentiated UC colonoid monolayers form a thin and non-continuous mucus layer. UC  
47 colonoids have increased expression of secretory lineage markers: ATOH1 and SPDEF,  
48 including MUC2 positive GCs and ChgA positive enteroendocrine cells but failed to secrete  
49 mucin when exposed to the cholinergic agonist carbachol and PGE<sub>2</sub>, which caused increased  
50 secretion in HS. Exposure to TNF- $\alpha$  (5days), reduced the number of GC with a greater  
51 percentage decrease in UC colonoids compared to HS.

52 **Conclusions** Abnormal mucus layer in UC is due to long term changes in epithelial cells that  
53 lead to abnormal mucus secretion as well as effects of the inflammatory environment to reduce  
54 the number of GC. This continued defect in GC mucus secretion may be involved in UC  
55 recurrence.

56

57

58

59

60

61

62

## 63 INTRODUCTION

64 UC is a chronic relapsing colonic disorder. A frequent colonic abnormality in UC is a reduced  
65 mucus layer secreted by GCs. Mucus layer defects contribute to the UC pathophysiology by  
66 triggering immune responses and/or allowing increased and more proximate exposure to luminal  
67 bacteria, both of which can lead to further reduced barrier maintenance, mucosal damage, and  
68 defective absorption and increased fluid secretion. The mucus layer is secreted by GCs which  
69 primarily occur in differentiated colonocytes. Secretion of pro inflammatory cytokines in UC  
70 contribute to the destruction of epithelia barrier including mucus layer.<sup>1 2</sup> However, even in the  
71 absence of endoscopic signs of active inflammation, the intestinal mucosa of UC patients in  
72 remission has a defective mucus layer and histological changes including branching of crypts,  
73 thickened muscularis mucosa, Paneth cell metaplasia, neuroendocrine cell hyperplasia. These  
74 changes suggest that the recovered intestine is permanently altered even after the inflammation  
75 has resolved. In fact, the intestinal epithelium of UC in remission has an expression profile that is  
76 significantly different from that found in healthy mucosa, that includes increases in expression of  
77 REG4, S100P, SERPINB5, DEFB1 and AQP3 and decreases in SLC16A1 and AQP8 expression.  
78 Importantly these genes modulate epithelial cell growth, sensitivity to apoptosis and immune  
79 function.<sup>3</sup> Other studies have shown that intestinal epithelium of IBD patients can harbor  
80 persistent alterations in gene expression or DNA methylation despite complete endoscopic and  
81 histologic remission.<sup>2 4 5</sup> These changes could contribute to disease relapse which is common in  
82 UC.<sup>3 6-8</sup> Altogether these results support the view that changes in the mucosa of patients with UC  
83 persist long after the inflammation has resolved.

84 We hypothesized that a long-term consequence of colonic inflammation is abnormal GC function  
85 that includes reduced stimulated mucus secretion. To test this hypothesis, we used an ex vivo  
86 human organoid/colonoid model from HS and from active and inactive mucosa of UC patients.  
87 Our results suggest that UC colonoids, that lack the presence of inflammatory cells, maintain an  
88 abnormal GC phenotype, with a reduced mucus layer due to defective cholinergic/PGE<sub>2</sub> induced  
89 mucus secretion but with an increase in number of GC. Exposure of UC colonoids to TNF- $\alpha$   
90 reduced the number of GCs, which occurred to a greater extent than in HS colonoids. Our results  
91 suggest that the abnormal mucus layer in UC is due to the effects of an active inflammatory  
92 environment to reduce the number of GCs as well as due to long-term changes in stimulated

93 mucin secretion that persist even in the absence of inflammatory cells and exist in colonoids  
94 made from active and inactive UC.

## 95 MATERIALS AND METHODS

96 **Patient population and biopsy collection:** Colonic biopsies were obtained from HS (5) and UC  
97 patients (7) (Table 1) undergoing colonoscopies or from patients having colonic surgery for  
98 refractory UC. In all cases, informed consent was obtained using an experimental protocol  
99 approved by the Johns Hopkins University Institutional Review Board (IRB# NA\_00038329).  
100 All procedures were performed in accordance with approved guidelines and regulations.  
101 Intestinal biopsies were collected from the ascending colon, descending colon, or sigmoid colon  
102 of HS screened with colonoscopy for colorectal cancer or gastrointestinal symptoms who had  
103 histologically normal colon. Seven UC patients had biopsies taken from area of uninvolved  
104 mucosa and/or active disease. Histologic status of the biopsies from colonoscopy or surgical  
105 samples are listed in **Table 1**. UC activity at the time of the colonoscopy was categorized  
106 according to the Mayo endoscopic subscore.<sup>9</sup> Active UC was defined as a Mayo endoscopic  
107 subscore of  $\geq 1$ ; inactive disease was defined as a Mayo score of 0 in a previously involved  
108 segment. Colonoids were established via Hopkins Conte Basic and Translational Digestive  
109 Diseases Research Core Center Integrated Physiology Core (NIH/NIDDK P30).

110 **Table 1: Clinical descriptions and origin of biopsies of non-IBD control (HS) and patients**  
111 **with Ulcerative colitis**

| Colon lines and disease | Number of subject included | Origin of biopsies |
|-------------------------|----------------------------|--------------------|
| UC inactive site        | 5                          | Ascending colon    |
| UC inactive site        | 2                          | Sigmoid colon      |
| UC active site          | 2                          | Descending colon   |
| UC active site          | 2                          | Rectum             |
| Healthy subject         | 2                          | Ascending colon    |
| Healthy subject         | 2                          | Descending colon   |
| Healthy subject         | 1                          | Sigmoid colon      |

113 **Organoid culture and monolayer formation:** Human colonoid cultures and monolayers were  
114 established utilizing the methods developed previously.<sup>10 11</sup> Colonoids were maintained as cysts  
115 embedded in Matrigel (Corning #356231, USA) in 24-well plates and passaged as previously.<sup>11</sup>  
116 Formation of enteroid monolayers was monitored by measurement of transepithelial electrical  
117 resistance (TEER). Undifferentiated 3D or monolayer cultures were induced to differentiate by  
118 removal of growth factors.<sup>3</sup>

119  
120 **Quantitative Real-Time Polymerase Chain Reaction:** Total RNA was extracted using the  
121 PureLink RNA Mini Kit (Life Technologies) according to the manufacturer's protocol.  
122 Complementary DNA was synthesized from 1 to 2 µg of RNA using SuperScript VILO Master  
123 Mix (Life Technologies). Quantitative real-time polymerase chain reaction (qRT-PCR) was  
124 performed using Power SYBR Green Master Mix (Life Technologies) on a QuantStudio 12K  
125 Flex real-time PCR system (Applied Biosystems, Foster City, CA).

126  
127 **Immunofluorescence staining, Confocal and TEM Image analysis:** Analysis of MUC2 by  
128 immunofluorescence and confocal microscopy was carried out as previously reported using  
129 commercially available antibody.<sup>5</sup> To evaluate qualitative mucin secretion colonoid monolayers  
130 were activated with the cholinergic analog carbachol (CCh) (25µM) to elevate intracellular Ca<sup>2+</sup>  
131 and with PGE<sub>2</sub> (1µM) to elevate cAMP in Krebs's solution for 15mins followed with MUC2  
132 staining and IF and TEM analysis.<sup>12 13</sup> Primary antibody included Rabbit anti-MUC2 (Santa Cruz  
133 Biotechnology, USA; Cat#sc7314).

134 **Statistical analysis:** Quantitative data are expressed as the mean ± and standard error of the  
135 mean (SEM). Statistical significance was determined using analysis of variance (ANOVA) with  
136 Bonferroni's post-test (Prism GraphPad) to compare groups including a minimum n = 3  
137 replicates. A  $p \leq 0.05$  was considered statistically significant.

138  
139 More detailed information is described in online supplementary materials and methods.

140

141

142

143

144 **RESULTS**

145 **UC derived colonoids can be grown in culture over multiple passages; however, they**  
146 **exhibit a reduced growth rate.**

147 Human UC patient derived colonoids were propagated and compared with site matched  
148 HS colonoids. Similar to colonoids grown from HS, UC colonoids formed 3D spheroids and  
149 could be passaged at least 40 times. Figure 1A shows the phase contrast images of colonoids  
150 from HS and UC patients 5days post splitting. Morphologically, UC colonoids showed more  
151 budding structures compared with HS. However, when the growth of 3D spheroids was  
152 quantitated by measuring the number of spheroids per well after each split over time and for  
153 multiple passages, active disease UC colonoids grew slowly and formed less spheroids compared  
154 to inactive UC and HS (figure 1B). We have demonstrated that human colonoids can be grown  
155 as 2D monolayers.<sup>14</sup> The progress of monolayer formation was monitored on a daily basis by a  
156 steady increase in transepithelial electrical resistance (TEER) (figure 1C). The monolayers were  
157 maintained in the undifferentiated (UD) crypt like state by growth in Wnt3A, RSPO1 and  
158 Noggin, while withdrawal of growth factors (Wnt3A and RSPO1) drove differentiation (DF) by  
159 5days. As shown in figure 1C, active and inactive UC colonoid were delayed in establishing  
160 confluency and had lower TEER (Inactive UC: UD  $700 \Omega \cdot \text{cm}^2 \pm 60$ , DF  $1500 \Omega \cdot \text{cm}^2 \pm 60$ ; n=10,  
161  $p \leq 0.05$  vs HS; active UC: UD  $600 \Omega \cdot \text{cm}^2 \pm 60$ , DF  $1200 \Omega \cdot \text{cm}^2 \pm 80$ ; n=10,  $p \leq 0.05$  vs HS)  
162 compared to monolayers from HS (UD  $1200 \Omega \cdot \text{cm}^2 \pm 55$ , DF  $2500 \Omega \cdot \text{cm}^2 \pm 55$ ; n=10) measured  
163 at post plating day10 for UD and day 15 for DF (figure 1D). The slow growth of colonoids in 3D  
164 and 2D monolayer formation suggests that there are sustained differences within the epithelial  
165 stem cell compartment of the UC vs HS mucosa.

166 **Colonoids derived from UC tissue form thin mucus layer and have defective barrier**  
167 **integrity.**

168 Active UC tissue have a reduced mucus layer and many UC colons have a reduced  
169 number of GC<sup>14</sup>. Similarly, colonoid monolayers made from the tissue derived from either  
170 inactive or active site of UC lacked a uniform mucus layer; instead they have a thin and a non-  
171 uniform mucus layer (figure 2A). We further analyzed the number of GC in these monolayers by  
172 counting MUC2 positive cells per monolayer. Surprisingly, differentiated UC monolayers from  
173 both active and inactive sites had a significantly higher number of GC compared with  
174 monolayers from HS (figure 2B). The primary component of mucus layer is MUC2, an

175 extensively O-glycosylated molecule that forms polymeric sheets to which luminal bacteria  
176 attach and which provides a food source for the microbiota.<sup>4 15</sup> O-glycans contribute to about  
177 80% of its mass and therefore are important determinant of mucus properties. O-glycosylation of  
178 MUC2 occurs post-translationally in the Golgi apparatus. The primary enzymes in this process  
179 are the core 1  $\beta$ 1,3-galactosyltransferase (C1galt1), core 2  $\beta$ 1, 6N-acetylglucosaminyltransferases  
180 (C2GnTs) and core 3  $\beta$ 1,3-N-acetylglucosaminyltransferase (C3GnT).<sup>16</sup> The mRNA levels of  
181 several enzymes responsible for glycosylation of mucin dimers were measure including C1galt1,  
182 C2GnT and C3GnT. Of the enzymes tested, C2GNT2, did not increase with differentiation of  
183 UC colonoids as it occurred in HS colonoids. Similar results were seen in colonoids from  
184 inactive and active sites of UC patients (figure 2C). In contrast, mRNAs of C1galt1 and C3GnT  
185 were not significantly different from HS (data not shown).

186 We further investigated the barrier integrity by exposing differentiated colonoid  
187 monolayers to apical *Escherichia coli* ( $1 \times 10^6$  cfu/ml) (8h) and performed 16S bacterial rRNA  
188 based real-time PCR analysis on total RNA extracted from monolayers. An increased amount of  
189 bacterial 16S-rRNA was present in monolayers from UC patients (inactive and active) as  
190 compared to HS, suggesting that UC colonoids have a defective mucus barrier (figure 2D).

#### 191 **Activation of secretory lineage differentiation in UC compared with non-IBD controls.**

192 In order to investigate the differentiation status and GC related gene expression in UC  
193 colonoids, we performed qPCR expression analysis of a selected panel of genes in UD and DF  
194 colonoids from HS and UC patients. The expression of the stem cell gene, Lgr5 and cell  
195 proliferation marker, Ki67 were slightly but not significantly increased in both inactive and  
196 active UC colonoids as compared with HS (figure 3A). Nonetheless, the expression of both Lgr5  
197 and Ki67 decreased with DF of UC colonoids as in HS. In addition, the expression of genes  
198 associated with mucus producing GC was determined. Shown in figure 3B, is a transcription  
199 factor atonal homolog 1 (ATOH1) which is a gatekeeper that controls the fate of intestinal  
200 progenitors. Intestinal progenitors with reduced Notch activity express high levels of ATOH1  
201 and commit to a secretory lineage fate (figure 3B). Therefore, ATOH1 expression in UD and DF  
202 colonoids was measured. Both active and inactive UC colonoids in UD as well as DF states had  
203 significantly higher expression of ATOH1 compared with HS (figure 3C, left). The expression of  
204 transcription factors downstream of ATOH1 were also analyzed, including SPDEF and Ngn3  
205 which specify differentiation and maturation of GC and enteroendocrine cells respectively

206 (figure 3B). Similar to ATOH1, the expression of SPDEF and Ngn3 were significantly higher in  
207 both active and inactive UC colonoids compared with HS (figure 3C, middle, right respectively).  
208 The expression of MUC2 (GC marker), ChgA (enteroendocrine cells) and Lyz (Paneth cells)  
209 were also determined (figure 3D). MUC2 message was increased in the UD colonoids from both  
210 active and inactive UC compared to HS, while the message was not significantly different  
211 between DF colonoids from each group. In contrast, ChgA transcripts followed a pattern of  
212 upregulation in UD as well as in DF UC colonoids from active and inactive UC compared to HS.  
213 Lysozyme transcripts were increased in only some of the UC colonoids, but there was no  
214 consistent change compared to HS in UD or DF active or inactive UC colonoids.

### 215 **UC colonoids differentially express ion transport proteins as compared with HS.**

216 To further define the differentiation states of UC colonoids, mRNA expression of several ion  
217 transport proteins and a carbonic anhydrase isoform was determined. These ion transporters and  
218 carbonic anhydrase isoform are known to play important roles in  $\text{Cl}^-$  and  $\text{HCO}_3^-$  secretion,  
219 electroneutral  $\text{Na}^+$  absorption, and intracellular pH regulation under physiological and  
220 pathophysiological conditions and have been shown to undergo changes in expression with  
221 differentiation in intestinal epithelial cells.<sup>17</sup> As reported previously and shown in figure 4,  
222 several ion transporters and carbonic anhydrase isoforms were up-regulated significantly at the  
223 mRNA level upon differentiation in HS colonoids. These included sodium hydrogen exchanger-3  
224 (*NHE3*) (18.4-fold), *DRA* (13.6-fold), *CA2* (2.0-fold), *NHE1* (2.7-fold). In contrast, several ion  
225 transporters were down-regulated significantly after differentiation, including *NKCC1* (20.1-  
226 fold), potassium channel, voltage gated, subfamily E, regulatory subunit 3 (*KCNE3*) (4.2-fold),  
227 and *CFTR* (12-fold). In contrast, UC colonoids exhibited somewhat different mRNA expression  
228 patterns compared with HS. In the UD state, UC colonoids (inactive and active site) had  
229 significantly higher expression of *NHE3* (inactive 27-fold; active 3.4fold), *DRA* (inactive 5-fold;  
230 active 3.2fold) and *CA2* (inactive 2.1-fold; active 1.2-fold), and lower expression of *CFTR*  
231 (inactive 0.5-folds; active 0.3folds). Differentiation failed to cause significant change in the  
232 expression pattern of *NHE3* and *DRA*. Importantly, when compared with DF HS, DF UC  
233 colonoids had significantly lower expression of *NHE3* (inactive 2-fold; active 4-fold) and *DRA*  
234 (inactive 5.5-fold; active 8-fold). The mRNA levels of several other transporters were not  
235 significantly different between the groups: anion exchanger 2 (*AE2*), electroneutral  $\text{Na}^+/\text{HCO}_3^-$   
236 co-transporter 1 (*NBCe1*), *NHE2* and putative anion transporter 1 (*PAT-1*). Overall this suggests



237 that in undifferentiated conditions UC colonoids were partially differentiation based on the  
238 increased mRNA expression pattern of NHE3, DRA, CA-II and decreased CFTR expression. In  
239 contrast, in differentiated colonoids from inactive and active UC, there was no further or even  
240 reduced differentiation based on reduced NHE3, DRA, and slight increase (not significant) in  
241 NKCC1 expression. These data suggest that the pattern of differentiation and expression of  
242 multiple ion transporters and a carbonic anhydrase isoform in UC colonoids is different from HS.  
243 **Goblet cells in UC colonoids do not respond to carbachol (Cch) and PGE<sub>2</sub> mediated mucin**  
244 **secretion.**

245 In addition to synthesizing MUC2, goblet cells release stored MUC2 granules in response to  
246 cholinergic plus cAMP related stimuli. Multiple studies have found that Ca<sup>2+</sup> signaling is  
247 required for the release of mucin-filled vesicles.<sup>18 19</sup> In accordance with the known muscarinic  
248 cholinergic signaling pathway for mucin secretion, we treated UC monolayers with carbachol  
249 (Cch) (25µM) to elevate intracellular Ca<sup>2+</sup> and with PGE<sub>2</sub> (1µM) to elevate cAMP<sup>20</sup>. In contrast  
250 to Cch/PGE<sub>2</sub> induced mucin secretion and creation of a thick mucus layer in colonoids from  
251 healthy subjects, monolayers from both inactive and active UC did not respond to the treatment  
252 (figure 5A). At the ultrastructure (TEM) level, GCs in HS had the expected appearance of  
253 granule-filled vesicles located just apical to the nucleus (figure 5B). Following stimulation with  
254 Cch+ PGE<sub>2</sub>, most of the GC in HS exhibited cavitation at the apical side. In contrast, GC in UC  
255 monolayers (both inactive and active) did not show any decrease in the mucin vesicles in  
256 response to the treatment. Overall, these results suggest that colonoids in UC can differentiate to  
257 GC, but have a compromised secretory function in response to cholinergic/cAMP stimulation.  
258 **TNF-α treatment reduces GC number.**

259 Since the colonoid model is devoid of any immune cells, we hypothesized that the differences in  
260 GC number in our model from those reported in UC patient tissue samples is because of the  
261 absence of active inflammatory cytokines secreted by immune cells in UC patients. To test this  
262 hypothesis, we differentiated monolayers from HS and UC patients in presence of inflammatory  
263 cytokine TNF-α (5ng/ml, added freshly with media change at 2<sup>nd</sup> day of 5day DF), followed by  
264 analysis of MUC-2 positive GC per monolayer. A representative example is shown in figure 6A  
265 and quantitation of multiple monolayers are shown in figure 6B, TNF-α treated monolayers had  
266 decreased numbers of MUC-2 positive GC in both HS (control: 40±12; TNF-α: 22±5.6) and UC  
267 colonoids (inactive control: 65±15; TNF-α: 20±12, active control: 71±14; TNF-α: 26±10). The

268 percent change in number of GC in UC was higher than in HS subject (UC inactive 69%; UC  
269 active 63%; HS: 45%). These results suggest that the decrease in GC number in UC patient  
270 tissue samples is dependent on active inflammatory cytokines.

## 271 **DISCUSSION**

272 In this study we provide a new mechanistic insight into the basis for the reduced mucus layer that  
273 is part of pathophysiology of UC. Although, a reduced number of GC as reported in many UC  
274 cases is considered as the sole cause of the reduced mucus layer, our studies suggest that the  
275 reduced mucus layer seen in UC patients is related to both reduced number and reduced  
276 secretory function of the remaining GC. Furthermore, we also provide evidence that the  
277 epithelial compartment in UC undergo alterations and have reduced expression of bicarbonate  
278 transporters: DRA and CFTR. Reduction in luminal  $\text{HCO}_3^-$  is known to contribute to failure of  
279 the mucin to unfold. This is one of the components important in the multicomponent  
280 pathophysiology of UC.

281 Altered characteristics of epithelial cells in UC is thought to be largely due to the  
282 inflammatory environment. However, it was not known which of these changes revert back to  
283 normal once the inflammation is removed or whether some of them are imprinted in the  
284 epithelial compartment. In the present study, we took advantage of the ability to establish stem  
285 cell derived colonoids from active and inactive areas of UC that could be passaged at least 40  
286 times and studied them in both the UD crypt like and DF upper crypt and surface cell state to  
287 begin defining some of these long term changes. Colonoids made from active and inactive areas  
288 of UC had properties distinct from colonoids made from the same colonic segments from healthy  
289 control subjects; for instance, the growth rate was much slower in colonoids from active UC and  
290 the TEER was significantly reduced in colonoids from both active and inactive UC. The reduced  
291 TEER is an indication of abnormal tight junctions and intestinal barrier function and duplicates a  
292 feature known to be present in patients with UC. Undifferentiated active and inactive UC  
293 colonoids had increased mRNA expression of proteins normally present in differentiated  
294 colonocytes, including NHE3, DRA, CA-II but had reduced expression of CFTR which is  
295 usually more highly expressed in the crypt; moreover, when the colonoids were exposed to  
296 conditions that led to differentiation in colonoids from HS, these genes either failed to increase  
297 or decreased in expression. MUC2 also behaved similarly and in a distinctly abnormal pattern,  
298 being increased in UD active and inactive UC colonoids, while there was no further increase

299 with application of differentiation conditions. Decreased expression of DRA is reported in  
300 various inflammatory diarrhea and in UC patients<sup>21</sup>. Similarly, decreased mRNA expression of  
301 CFTR in UC colonoids is in accordance with the reports from animal model of colitis as well as  
302 from UC patients (DOI [10.21203/rs.3.rs-22104/v1](https://doi.org/10.21203/rs.3.rs-22104/v1)-preprint). These results are consistent with  
303 long term effect of inflammation in UC colonoids exhibiting early differentiation, that fits with  
304 the reduced proliferation shown in figure 1B. However, the mechanisms for these long-term  
305 changes has not been identified.

306 The UC colonoids had an increased number of GC compared to HS colonoids. This was  
307 consistent with the increased level of ATOH1, a transcription factor that increases stem cell  
308 differentiation towards the secretory pathway. Moreover, there was also an increase in  
309 Chromogranin A positive enteroendocrine cells in DF UC colonoids, another part of the ATOH1  
310 driven secretory cell developmental pathway. Several studies have reported greater numbers of  
311 enteroendocrine cells in the colonic mucosa of the patients with active UC, indicating similarity  
312 between the UC colonoid model and intact colon.<sup>22 23</sup> In spite of higher expression of GCs, both  
313 active and inactive UC colonoids formed a thin mucus layer, suggesting defects at the level of  
314 the signaling pathways or secretory machinery required for mucus secretion.

315 Secretion of mucin release from GC was examined by exposure to the muscarinic agonist  
316 carbachol plus the cAMP agonist PGE<sub>2</sub>, agonists known to cause mucin exocytosis.<sup>13</sup> Formation  
317 of a functional mucus layer is a result of a complex multi-step process. It starts with an increase  
318 in intracellular Ca<sup>2+</sup> in response to activation of muscarinic M3 receptors, which is followed by  
319 fusion of mucin containing vesicles, compound exocytosis and finally mucin unfolding via  
320 HCO<sub>3</sub><sup>-</sup> exposure. Mucin release was markedly reduced in both active and inactive UC colonoids  
321 based on the measurement of changes in the mucus layer in colonoid monolayers and by  
322 examining the apical area of GC by TEM (figure 5). Further studies are required to understand  
323 which of the multiple steps in mucus secretion is abnormal in UC. The second contributor to a  
324 thin mucin layer in UC colonoids is related to dependence of mucus unfolding on luminal HCO<sub>3</sub><sup>-</sup>  
325 . Although it is not known if the HCO<sub>3</sub><sup>-</sup> comes from adjacent epithelial cells or is more closely  
326 associated with the GC, but the mRNAs of both DRA and CFTR: two major colonic apical  
327 HCO<sub>3</sub><sup>-</sup> transporters were significantly reduced in the differentiated UC colonoids. The third  
328 likely contributor to abnormal GC mucin secretion is abnormal expression of C2GnT2, an  
329 enzyme responsible for O-glycosylation of MUC2. C2GnT2 is highly expressed in the mouse

330 small intestine and colon and C2GnT2 deficiency reduces levels of core 2 and 4 O-glycans, as  
331 well as I-branching. Moreover, C2GnT2<sup>-/-</sup> mice exhibit increased susceptibility to DSS-induced  
332 colitis. Additional studies are required to determine if mucin glycosylation is abnormal in UC  
333 colonoids and to define the consequence of altered glycosylation on mucus layer formation.

334 A thin and defective mucus layer is a signature of UC and this has been attributed to the  
335 reduced number of colonic GC. In contrast, in our studies, UC colonoids had an increased  
336 number of GC compared to HS colonoids. One of the limitations of studies with stem cell  
337 derived intestinal organoids is that they only contain epithelial cells and lack the many additional  
338 cell types present in the normal intestine, including inflammatory and immune cells.  
339 Consequently, disease models using colonoids do not entirely duplicate the inflammatory or  
340 immune environment that plays a critical role in pathophysiology of many GI diseases, including  
341 IBD. To deal with this limitation, co-culture with additional cell types has been developed,  
342 while use of iPSC derived organoids includes some of the additional mesenchymal cells present  
343 in the colon. Based on this limitation, we hypothesized that the difference in GC number in UC  
344 tissue compared to UC colonoids might be due to lack of the inflammatory environment. In fact,  
345 when colonoids were exposed to TNF- $\alpha$  for 5 days, there was a decrease in GC number in both  
346 HS and UC colonoids, with the reduction in number in the UC colonoids exceeding that in HS.  
347 This finding supports the interpretation that the reduced number of GC in UC is at least in part  
348 due to the local inflammatory environment. The conclusion from these studies is that the  
349 reduced protective mucus layer in UC is a consequence of both a reduced number of GC, which  
350 appears to be a reversible inflammation dependent phenomenon, and reduced mucin secretion by  
351 the remaining GC, which appears to be a long term part of the disease.

352 The current observations, further support several recent studies that have suggested that  
353 epithelial cells from the involved colonic mucosa of patients with UC acquire a unique  
354 transcriptional signature that is maintained long after the acute inflammation has resolved,  
355 suggesting permanent epithelial cell changes.<sup>3</sup> Epigenetic changes in genes from UC mucosa  
356 have been suggested related to pathways that affect antigen processing and presentation, cell  
357 adhesion, B- and T-cell receptor signaling, JAK-STAT signaling, and transforming growth factor  
358 beta (TGF- $\beta$ ) signaling etc. However, the extent and consequences of epigenetic changes in IBD  
359 have not been adequately characterized. However, given that abnormal barrier function and a

360 reduced protective mucin layer contribute to initiation of IBD and potentially to recurrence, the  
361 presence of both characteristics in colonoids over multiple passages and in colonoids made from  
362 inactive as well as active UC tissue, suggests that UC mucosa is primed for recurrence even in  
363 the absence of inflammation. We speculate that an approach to reverse these changes in UC  
364 colonoids has the potential to prevent UC recurrence and potentially to prevent the proximal  
365 spread of UC, a concerning and unmet need in UC management.

366 **Acknowledgements** We thank the Hopkins Conte Basic and Translational Digestive Diseases  
367 Research Core Center Integrated Physiology and Translational Research Enhancement Cores for  
368 their contributions to obtaining and maintaining colonoids.

369 **Contributors** VS designed the concept, supervised the study, conducted experiments, analyzed  
370 data, and wrote the manuscript. KJ, JY, RL conducted experiments. SL, HY, recruited patients  
371 and/or collected samples. SL, JI, JF established colonoids, NZ supervised colonoid culture.

372 **Competing interests** None declared.

373 **Funding** This study is partly supported by National Institutes of Health grants R01-DK-116352,  
374 UO1-DK-10316, and P30-DK-89502 (the Hopkins Basic and Translational Research Digestive  
375 Diseases Research Core Center)

376 **Patient consent** Obtained.

377 **Ethics approval** Johns Hopkins Medicine IRB committee.

378

379

380

381

382

383

384

385

386 **REFERENCES**

- 387 1 Nava P, Koch S, Laukoetter MG, *et al.* Interferon-gamma regulates intestinal epithelial  
388 homeostasis through converging beta-catenin signaling pathways. *Immunity*  
389 2010;32(3):392-402.
- 390 2 Su L, Nalle SC, Shen L, *et al.* TNFR2 activates MLCK-dependent tight junction  
391 dysregulation to cause apoptosis-mediated barrier loss and experimental colitis.  
392 *Gastroenterology* 2013;145(2):407-15.
- 393 3 Planell N, Lozano JJ, Mora-Buch R, *et al.* Transcriptional analysis of the intestinal  
394 mucosa of patients with ulcerative colitis in remission reveals lasting epithelial cell  
395 alterations. *Gut* 2013;62(7):967-76.
- 396 4 Larsson JM, Karlsson H, Sjovall H, *et al.* A complex, but uniform O-glycosylation of the  
397 human MUC2 mucin from colonic biopsies analyzed by nanoLC/MSn. *Glycobiology*  
398 2009;19(7):756-66.
- 399 5 In J, Foulke-Abel J, Zachos NC, *et al.* Enterohemorrhagic *Escherichia coli* reduce mucus  
400 and intermicrovillar bridges in human stem cell-derived colonoids. *Cell Mol*  
401 *Gastroenterol Hepatol* 2016;2(1):48-62 e3.
- 402 6 Dotti I, Mora-Buch R, Ferrer-Picon E, *et al.* Alterations in the epithelial stem cell  
403 compartment could contribute to permanent changes in the mucosa of patients with  
404 ulcerative colitis. *Gut* 2017;66(12):2069-79.
- 405 7 Cooke J, Zhang H, Greger L, *et al.* Mucosal genome-wide methylation changes in  
406 inflammatory bowel disease. *Inflamm Bowel Dis* 2012;18(11):2128-37.
- 407 8 Narula N, Aruljothy A, Alshahrani AA, *et al.* Histologic remission does not offer  
408 additional benefit for ulcerative colitis patients in endoscopic remission. *Aliment*  
409 *Pharmacol Ther* 2020;52(11-12):1676-82.

- 410 9 Schroeder KW, Tremaine WJ, Ilstrup DM. Coated oral 5-aminosalicylic acid therapy for  
411 mildly to moderately active ulcerative colitis. A randomized study. *N Engl J Med*  
412 1987;317(26):1625-9.
- 413 10 Sato T, Stange DE, Ferrante M, *et al.* Long-term expansion of epithelial organoids from  
414 human colon, adenoma, adenocarcinoma, and Barrett's epithelium. *Gastroenterology*  
415 2011;141(5):1762-72.
- 416 11 Noel G, Baetz NW, Staab JF, *et al.* A primary human macrophage-enteroid co-culture  
417 model to investigate mucosal gut physiology and host-pathogen interactions. *Sci Rep*  
418 2017;7:45270.
- 419 12 Gustafsson JK, Ermund A, Johansson ME, *et al.* An ex vivo method for studying mucus  
420 formation, properties, and thickness in human colonic biopsies and mouse small and large  
421 intestinal explants. *Am J Physiol Gastrointest Liver Physiol* 2012;302(4):G430-8.
- 422 13 Yang N, Garcia MA, Quinton PM. Normal mucus formation requires cAMP-dependent  
423 HCO<sub>3</sub><sup>-</sup> secretion and Ca<sup>2+</sup>-mediated mucin exocytosis. *J Physiol* 2013;591(18):4581-93.
- 424 14 Gersemann M, Becker S, Kubler I, *et al.* Differences in goblet cell differentiation  
425 between Crohn's disease and ulcerative colitis. *Differentiation* 2009;77(1):84-94.
- 426 15 Hollingsworth MA, Swanson BJ. Mucins in cancer: protection and control of the cell  
427 surface. *Nat Rev Cancer* 2004;4(1):45-60.
- 428 16 Thomsson KA, Holmen-Larsson JM, Angstrom J, *et al.* Detailed O-glycomics of the  
429 Muc2 mucin from colon of wild-type, core 1- and core 3-transferase-deficient mice  
430 highlights differences compared with human MUC2. *Glycobiology* 2012;22(8):1128-39.
- 431 17 Yin J, Tse CM, Avula LR, *et al.* Molecular Basis and Differentiation-Associated  
432 Alterations of Anion Secretion in Human Duodenal Enteroid Monolayers. *Cell Mol*  
433 *Gastroenterol Hepatol* 2018;5(4):591-609.

- 434 18 Abdullah LH, Bundy JT, Ehre C, *et al.* Mucin secretion and PKC isoforms in SPOC1  
435 goblet cells: differential activation by purinergic agonist and PMA. *Am J Physiol Lung*  
436 *Cell Mol Physiol* 2003;285(1):L149-60.
- 437 19 Wollman R, Meyer T. Coordinated oscillations in cortical actin and Ca<sup>2+</sup> correlate with  
438 cycles of vesicle secretion. *Nat Cell Biol* 2012;14(12):1261-9.
- 439 20 Garcia MA, Yang N, Quinton PM. Normal mouse intestinal mucus release requires  
440 cystic fibrosis transmembrane regulator-dependent bicarbonate secretion. *J Clin Invest*  
441 2009;119(9):2613-22.
- 442 21 Lohi H, Makela S, Pulkkinen K, *et al.* Upregulation of CFTR expression but not  
443 SLC26A3 and SLC9A3 in ulcerative colitis. *Am J Physiol Gastrointest Liver Physiol*  
444 2002;283(3):G567-75.
- 445 22 Hernandez-Trejo JA, Suarez-Perez D, Gutierrez-Martinez IZ, *et al.* The pro-  
446 inflammatory cytokines IFN $\gamma$ /TNF $\alpha$  increase chromogranin A-positive  
447 neuroendocrine cells in the colonic epithelium. *Biochem J* 2016;473(21):3805-18.
- 448 23 Sidhu R, Drew K, Mcalindon ME, *et al.* Elevated serum chromogranin A in irritable  
449 bowel syndrome (IBS) and inflammatory bowel disease (IBD): a shared model for  
450 pathogenesis? *Inflamm Bowel Dis* 2010;16(3):361.

451

452

453

454

455

456

457

458



## 459 **FIGURE LEGENDS**

460 **Figure 1: UC colonoids have differences in growth compared to colonoids from HS:** A) A  
461 representative bright field image of 3D colonoid from HS, inactive and active site of UC  
462 patients. B) Number of 3D spheroids per well from HS, inactive and active site of UC patients.  
463 Quantitation of spheroids were made 2 days post splitting. C) Changes in TEER of colonoid  
464 monolayers from HS (black triangle), inactive (circle), and active (triangle) UC. TEER of  
465 monolayer increased further upon 5 days of differentiation (Wnt3A and Rspnd removal).  
466 Spheroids and monolayers from all the subjects were analyzed at least 3 times (n=5 HS, 4=UC  
467 active and 7=UC inactive), \* $p < 0.05$  vs HS, # $p < 0.05$  vs inactive UC. Scale bar 20 $\mu$ m.

468 **Figure 2: UC colonoids have defects in mucus secretion and barrier function:** A) Methanol–  
469 Carnoy's fixed differentiated colonoid monolayers stained with MUC2 (green), nucleus (blue).  
470 Representative confocal XZ (above) and 3D-XYZ (below) projections depicting the MUC2 layer  
471 in colonoids monolayer is shown. B) Average number of GC expressed post 5 days of  
472 differentiation of colonoid monolayers. C) Differences in the mRNA expression of C2GNT2  
473 mRNA, post differentiation of monolayers from HS, inactive and active UC sites. D) Bacterial  
474 16S rRNA expression in colonoids post 8h infection of differentiated monolayers. A and B:  
475 multiple areas of monolayers from each group were analyzed (n=5 HS, 4=UC active and 7=UC  
476 inactive). C and D: n=3 monolayers from each group was analyzed at different times. Results are  
477 shown as Mean $\pm$ SEMs. \* $p < 0.05$  vs HS. Scale bar 20 $\mu$ m.

478 **Figure 3: Differential gene expression profiles in UD and DF colonoids from HS compared**  
479 **with UC patients:** Relative mRNA levels of: A) proliferation genes, B) schematic representation  
480 of absorptive and secretory pathways starting from a progenitor and the genes involved in this  
481 process, C) secretory lineage genes, D) genes specific to different cell types, by qPCR.  
482 Messenger RNA levels are normalized to *18S ribosomal RNA* expression. Result is normalized to  
483 HS set as 1 and expressed as fold change. Results are Mean $\pm$ SEMs. \* $p < 0.05$  vs HS-UD; # $p < 0.05$   
484 vs HS-DF; 3D colonoids from n=5HS, 4=UC active and 7=UC inactive sites; some colonoid  
485 lines were studied multiple times.

486 **Figure 4: mRNA levels of selected ion transporters and carbonic anhydrase in UC**  
487 **colonoids compared with HS.** A) The mRNA levels of selected ion transporters were  
488 determined by qRT-PCR and relative fold change between undifferentiated (UD) and

489 differentiated (DF) colonoids were calculated using *18S ribosomal RNA* as endogenous control.  
490 Results are normalized to HS set as 1 and expressed as fold change. Mean±SEMs.\*p<0.05 vs  
491 HS-UD; #p<0.05 vs HS-DF; 3D colonoids from n=5-HS, 4=UC active and 7=UC inactive sites;  
492 some colonoid lines were studied multiple times.

493 **Figure 5: UC colonoids have defects in mucus secretion:** Colonoid monolayers from HS,  
494 inactive and active UC sites were treated with carbachol (25μM) + PGE<sub>2</sub> (1μM) for 15mins and  
495 then analyzed. A representative image from each group is shown. A) Methanol–Carnoy's fixed  
496 monolayer stained for mucus layer, Muc2 (green), nucleus (blue). Scale bar 20μm. B) TEM of  
497 GC from control and Cch/PGE<sub>2</sub> treated monolayers from different groups. Note the empty area  
498 on the apical side of GC in HS, treated with Cch/PGE<sub>2</sub>, but not in UC. n=3 monolayers from  
499 different subjects in each group. Scale bar 500nm.

500 **Figure 6: TNF-α (5ng/ml, 5 days) treatment decreases GC number:** A) Monolayer from HS  
501 and UC- inactive and active sites were differentiated alone or with TNFα (5ng/ml) for 5days and  
502 MUC2 positive GC (green) were analyzed using confocal imaging. Fresh TNFα (5ng/ml) was  
503 added during media change, at second day of 5day period. B) Average number of GC expressed  
504 in untreated or TNFα treated monolayers. Results are Mean±SEMs.\*p<0.05 vs control/untreated  
505 monolayers, n=3 separate monolayer from each group. Scale bar 20μm.

506

507

**A**

Healthy subjects

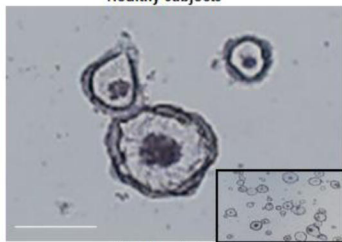

Inactive site

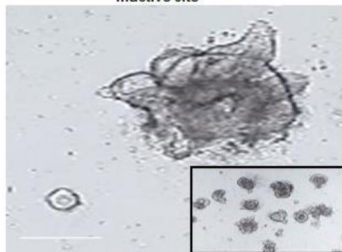

Active site

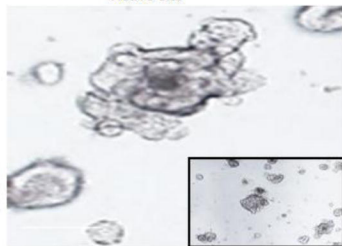**B** Number of spheroids per well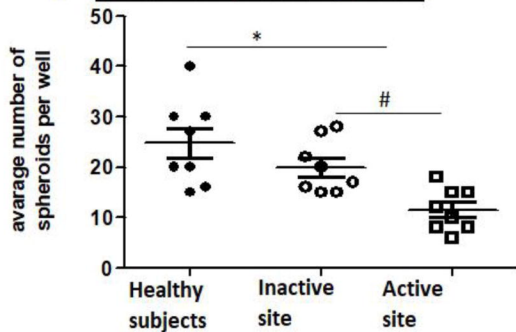**C**Trans epithelial Electrical Resistance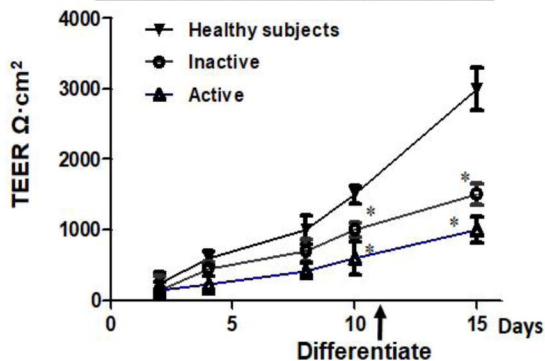

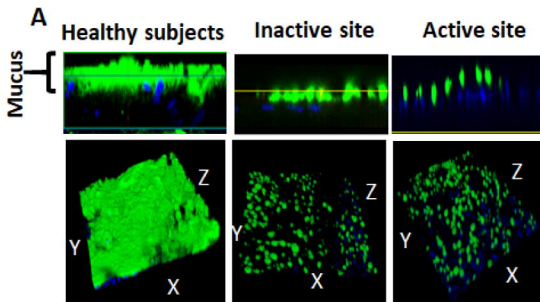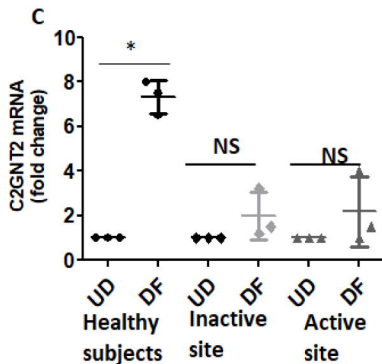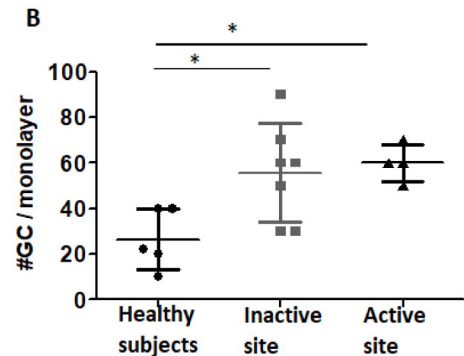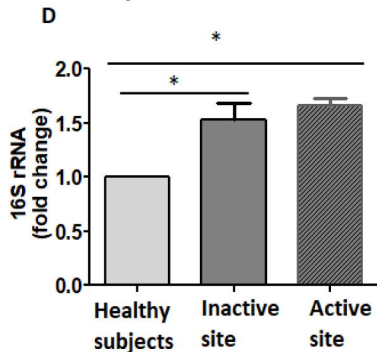

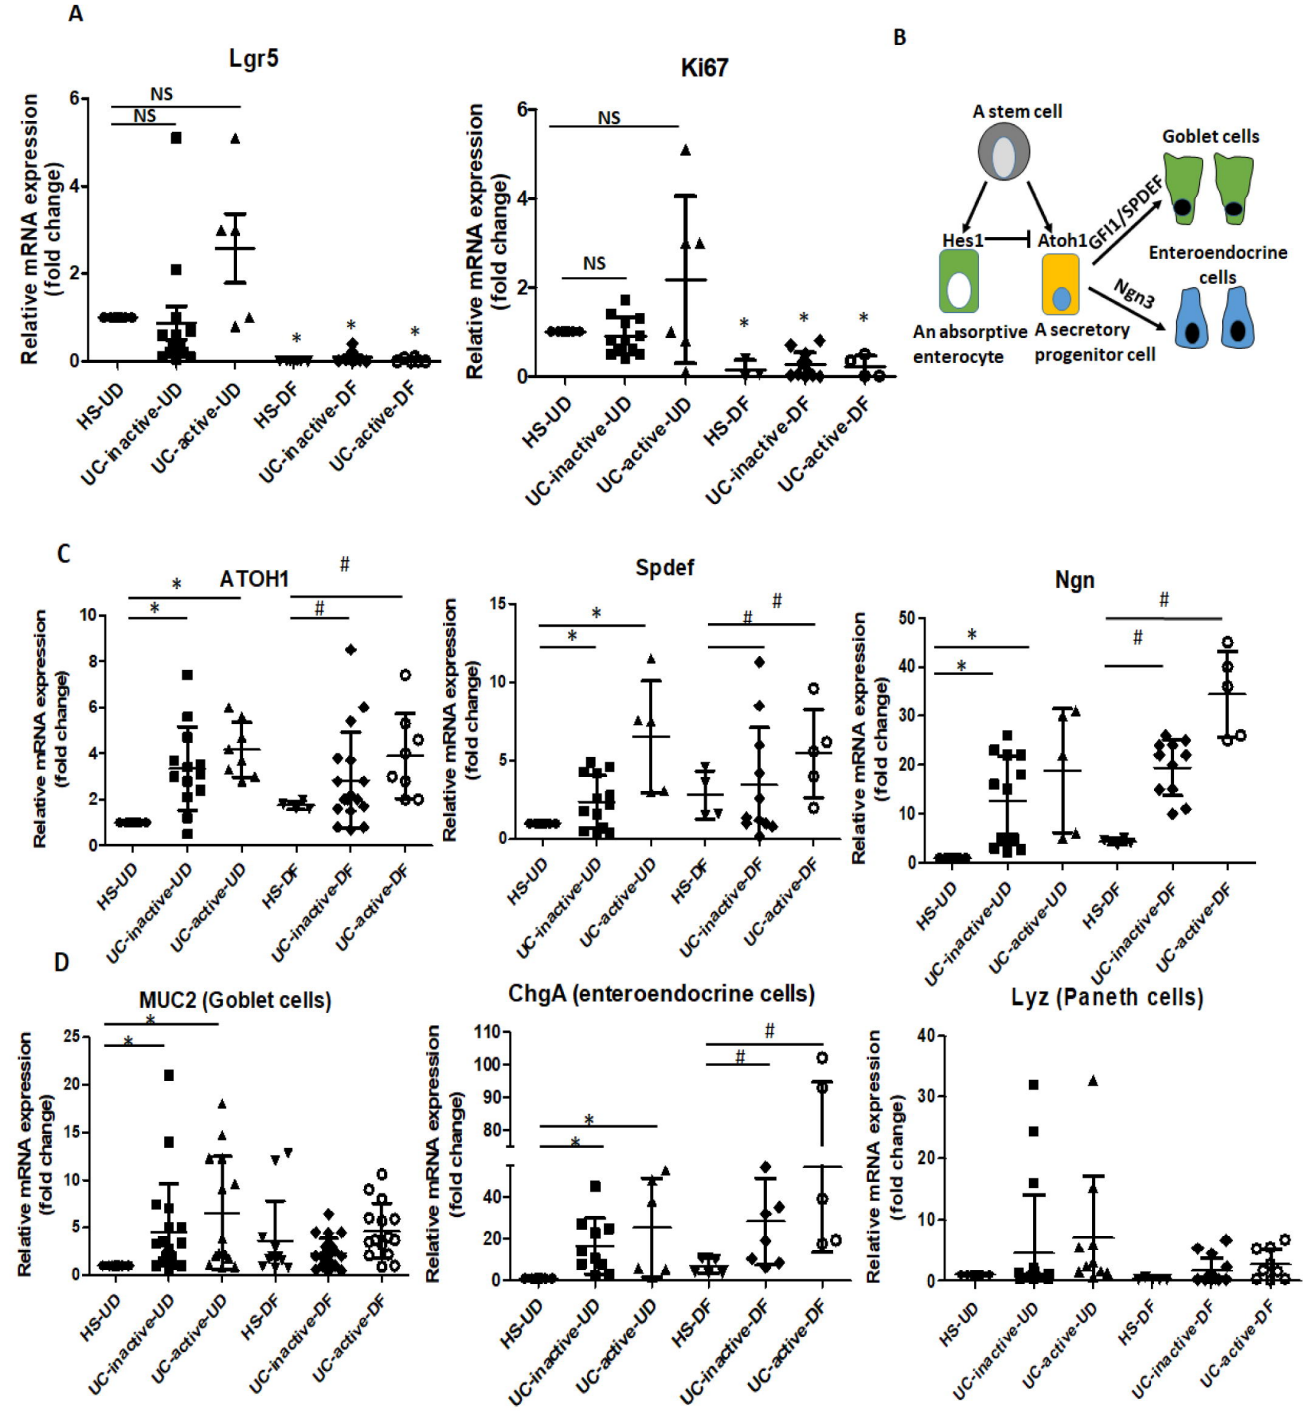

**NHE3**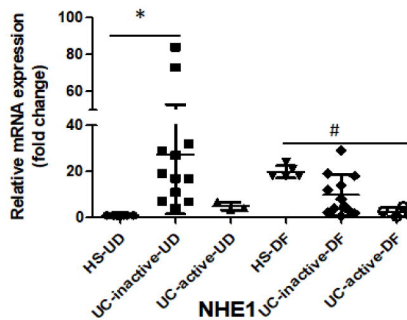**DRA**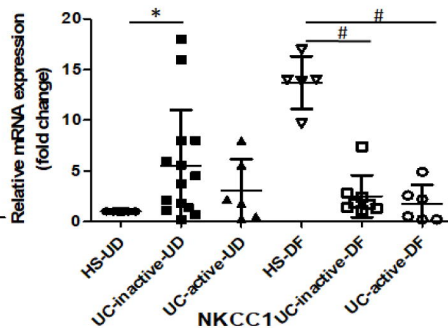**CA-II**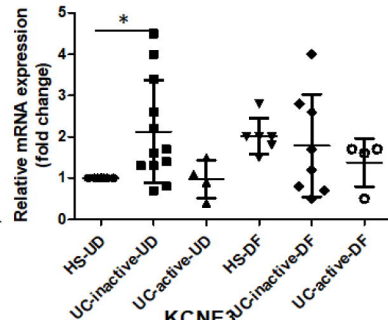**NHE1**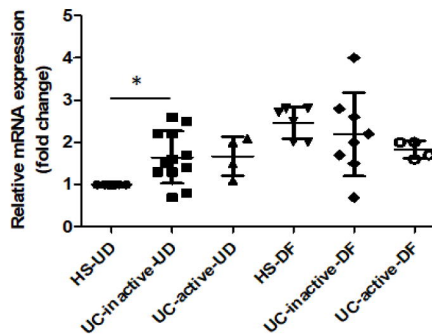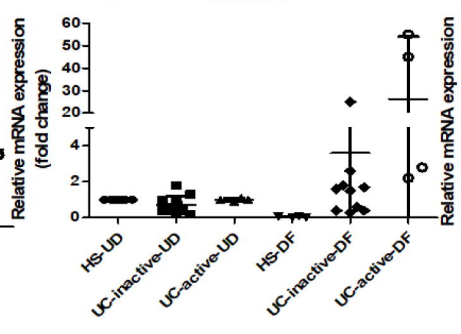**KCNE3**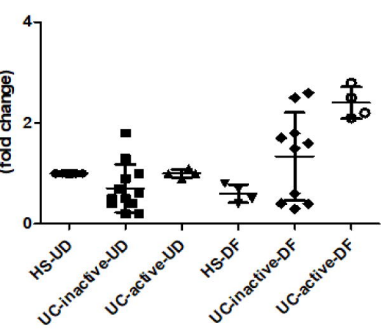**CFTR**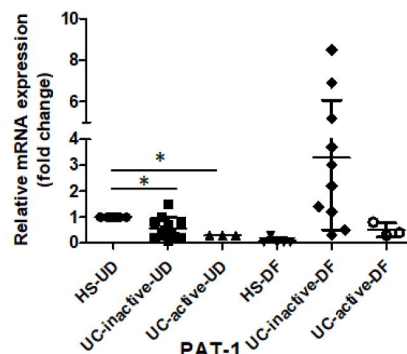**NBCe1**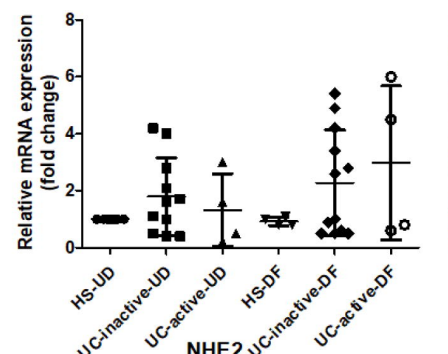**AE2**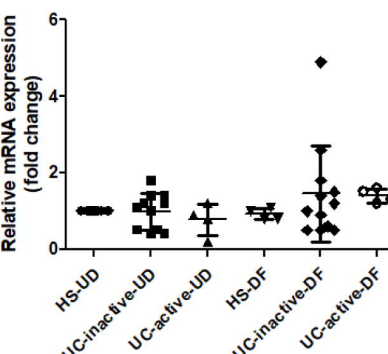**PAT-1**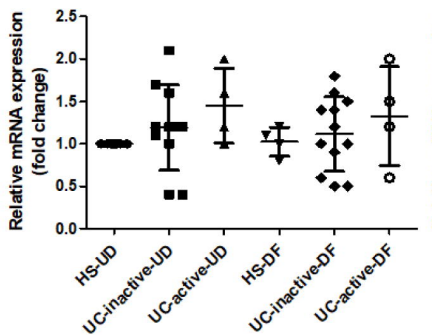**NHE2**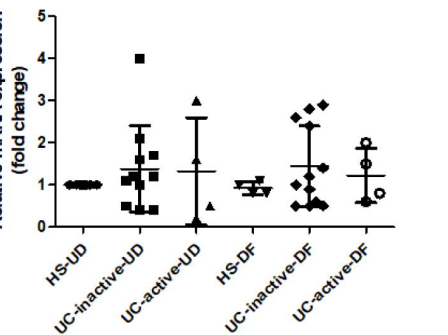

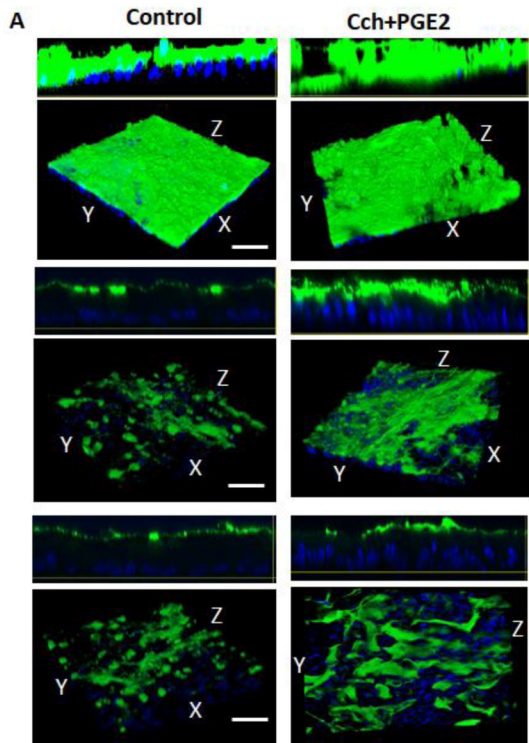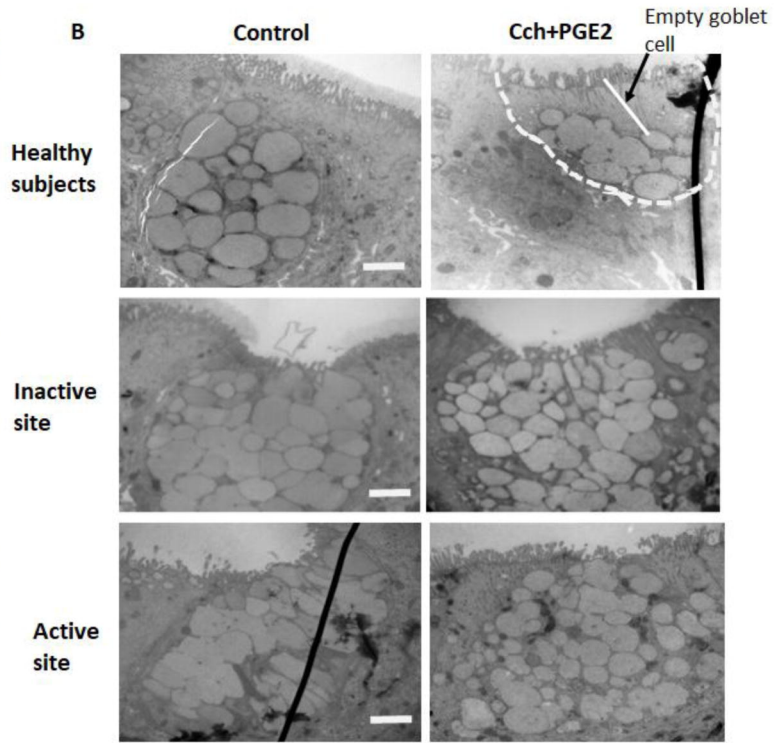

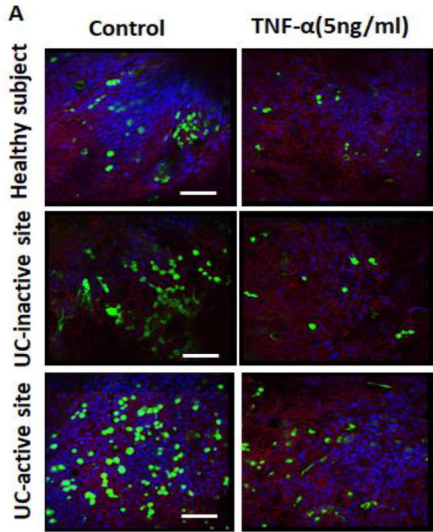

#GC / monolayer

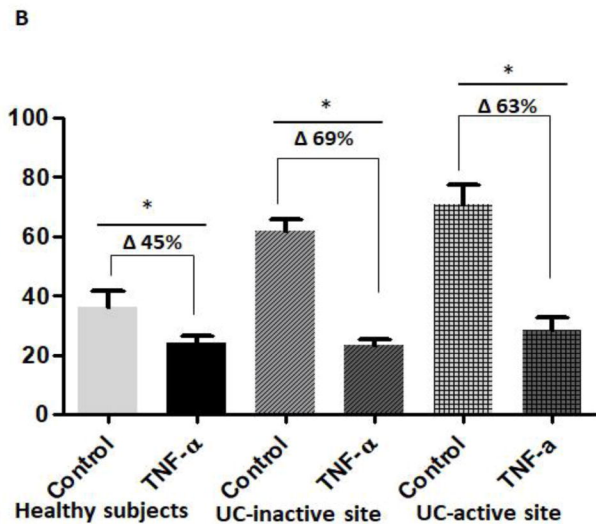

Source: https://www.biorxiv.org/content/10.1101/2021.03.17.435871v1.full.pdf
